# Supplementary material for: Commercial genetic testing for type 2 polysaccharide storage myopathy and myofibrillar myopathy does not correspond to a histopathological diagnosis
Source: PubMed Central journal article supplement — Equine Vet J. 2020 Oct 29;53(4):690–700. doi: 10.1111/evj.13345 (PMC7937766; doi:10.1111/evj.13345), 2020-10-29
Supplement: NIHMS1661435-supplement-Infographic.pdf [file NIHMS1661435-supplement-Infographic.pdf]

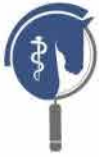

## Do commercial genetic tests for PSSM2 and myofibrillar myopathy (MFM) correspond to a histopathological diagnosis?

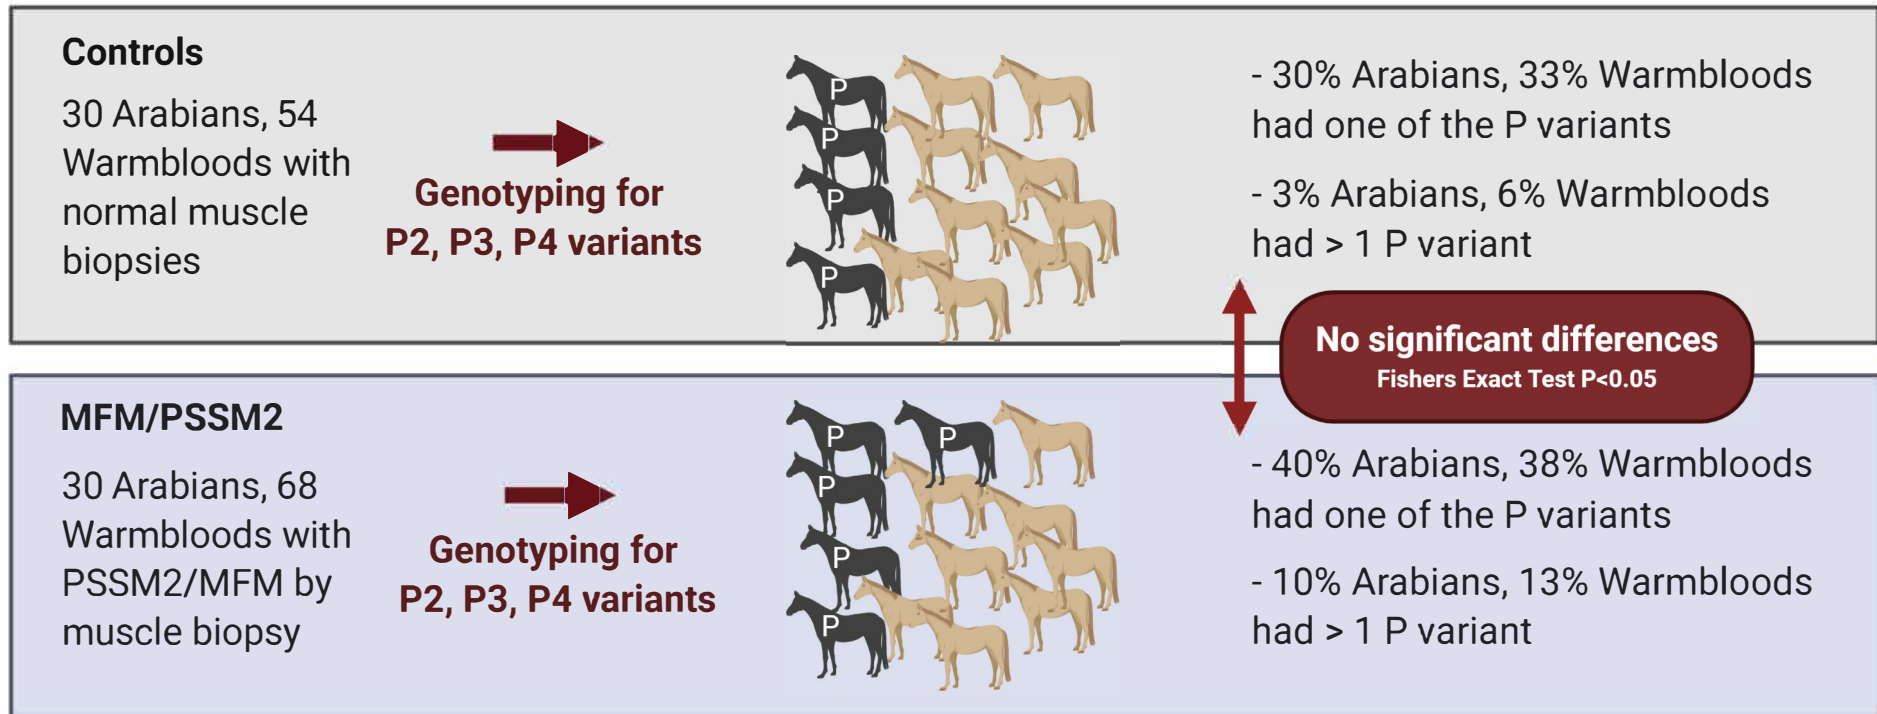

Test sensitivity for each P variant was < 33%

P2 and P3 were present in 25 early domestic and modern breeds (public repositories)

**A single or combination of commercial genetic test P variants were not statistically associated with a histological diagnosis of PSSM2 and MFM, the means by which these diseases were discovered**
