# Supplementary material for: Commercial genetic testing for type 2 polysaccharide storage myopathy and myofibrillar myopathy does not correspond to a histopathological diagnosis
Source: PubMed Central journal article supplement — Equine Vet J. 2020 Oct 29;53(4):690–700. doi: 10.1111/evj.13345 (PMC7937766; doi:10.1111/evj.13345), 2020-10-29
Supplement: NIHMS1661435-supplement-Supp_Table_2.pdf [file NIHMS1661435-supplement-Supp_Table_2.pdf]

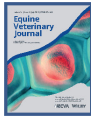

**Table S2:** Genomes surveyed from the NCBI SRA from which one or more P variant genotypes were available. Genotypes matching the reference allele are denoted by a period. nc indicates the genotype was not called due to failure to meet quality criteria (e.g. minimum 5 reads). Samples are classified as modern, early domestic (400-500 years old), or ancient with breed, species, or sample origin noted when available.

|    | A                | B         | C          | D          | E         | F                     | G                    |
|----|------------------|-----------|------------|------------|-----------|-----------------------|----------------------|
| 3  |                  | <b>P2</b> | <b>P3b</b> | <b>P3a</b> | <b>P4</b> |                       |                      |
| 4  | <b>RunID/Ref</b> | <b>A</b>  | <b>G</b>   | <b>G</b>   | <b>G</b>  | <b>Classification</b> | <b>Breed/Origin</b>  |
| 5  | ERR3628174       | nc        | nc         | .          | nc        | Modern                | Franches-Montagnes   |
| 6  | ERR979788        | AG        | nc         | nc         | nc        | Modern                | Franches-Montagnes   |
| 7  | ERR2731061       | nc        | nc         | nc         | .         | Modern                | Holsteiner           |
| 8  | ERR863167        | .         | nc         | nc         | nc        | Modern                | Icelandic Horse      |
| 9  | ERR793393        | .         | nc         | nc         | nc        | Modern                | Icelandic Horse      |
| 10 | ERR3628173       | nc        | nc         | nc         | .         | Modern                | unknown              |
| 11 | ERR1527960       | AG        | nc         | nc         | .         | Modern                | Franches-Montagnes   |
| 12 | ERR1527953       | CC        | nc         | nc         | GA        | Modern                | Franches-Montagnes   |
| 13 | ERR1527954       | GG        | nc         | nc         | .         | Modern                | Franches-Montagnes   |
| 14 | ERR1527957       | .         | nc         | nc         | AA        | Modern                | Franches-Montagnes   |
| 15 | ERR2179540       | .         | nc         | nc         | .         | Modern                | Franches-Montagnes   |
| 16 | ERR979790        | AG        | nc         | nc         | .         | Modern                | Franches-Montagnes   |
| 17 | ERR1545182       | .         | .          | nc         | nc        | Modern                | German WarmBlood     |
| 18 | ERR1545185       | .         | nc         | nc         | .         | Modern                | German WarmBlood     |
| 19 | ERR1545180       | .         | nc         | nc         | .         | Modern                | German WarmBlood     |
| 20 | ERR1527966       | .         | nc         | nc         | .         | Modern                | Haflinger            |
| 21 | ERR2179547       | .         | .          | nc         | nc        | Modern                | Holsteiner           |
| 22 | ERR979800        | .         | nc         | nc         | .         | Modern                | Quart Horse          |
| 23 | ERR3628171       | AG        | .          | nc         | nc        | Modern                | unknown              |
| 24 | ERR1305962       | .         | nc         | .          | .         | Modern                | American Paint Horse |
| 25 | ERR1527967       | .         | .          | nc         | .         | Modern                | Dutch Warmblood      |
| 26 | ERR979794        | .         | .          | nc         | .         | Modern                | Franches-Montagnes   |
| 27 | ERR979793        | GG        | .          | .          | nc        | Modern                | Franches-Montagnes   |
| 28 | ERR979785        | AG        | .          | nc         | .         | Modern                | Franches-Montagnes   |
| 29 | ERR1527952       | .         | .          | nc         | .         | Modern                | Franches-Montagnes   |
| 30 | ERR979795        | AG        | .          | nc         | .         | Modern                | Franches-Montagnes   |
| 31 | ERR1527961       | AG        | .          | nc         | GA        | Modern                | Franches-Montagnes   |
| 32 | ERR979784        | AG        | GA         | nc         | .         | Modern                | Franches-Montagnes   |
| 33 | ERR1527959       | .         | .          | nc         | GA        | Modern                | Franches-Montagnes   |
| 34 | ERR1527965       | AG        | AA         | nc         | AA        | Modern                | Franches-Montagnes   |
| 35 | ERR1527964       | .         | AA         | nc         | GA        | Modern                | Franches-Montagnes   |
| 36 | ERR466186        | .         | .          | nc         | .         | Modern                | Franches-Montagnes   |
| 37 | ERR2179541       | AC        | .          | nc         | GA        | Modern                | Franches-Montagnes   |
| 38 | ERR1545179       | .         | .          | nc         | .         | Modern                | German WarmBlood     |
| 39 | ERR1545184       | .         | .          | nc         | GA        | Modern                | German WarmBlood     |
| 40 | ERR1545187       | .         | .          | nc         | .         | Modern                | German WarmBlood     |
| 41 | ERR979798        | .         | .          | .          | nc        | Modern                | Quarter Horse        |
| 42 | ERR979797        | GG        | .          | nc         | AA        | Modern                | Quarter Horse        |
| 43 | ERR979802        | .         | .          | nc         | .         | Modern                | Standardbred         |
| 44 | ERR979801        | AG        | .          | nc         | .         | Modern                | Standardbred         |
| 45 | ERR1735862       | .         | nc         | .          | .         | Modern                | Thoroughbred         |
| 46 | ERR979796        | .         | nc         | .          | .         | Modern                | unknown              |
| 47 | ERR1021816       | .         | .          | nc         | .         | Modern                | Yakutian Horse       |
| 48 | ERR1021818       | .         | .          | nc         | .         | Modern                | Yakutian Horse       |
| 49 | ERR1021823       | .         | .          | nc         | .         | Modern                | Yakutian Horse       |

|    | A          | B  | C  | D  | E  | F      | G                    |
|----|------------|----|----|----|----|--------|----------------------|
| 50 | ERR1021824 | .  | GA | nc | .  | Modern | Yakutian Horse       |
| 51 | ERR1021819 | .  | GA | nc | .  | Modern | Yakutian Horse       |
| 52 | ERR1527950 | .  | .  | .  | .  | Modern | Akhal-Teke           |
| 53 | ERR1527948 | .  | .  | .  | .  | Modern | Akhal-Teke           |
| 54 | ERR1527949 | .  | .  | .  | .  | Modern | Akhal-Teke           |
| 55 | ERR1527947 | .  | .  | .  | .  | Modern | Akhal-Teke           |
| 56 | ERR1305964 | .  | .  | .  | .  | Modern | American Paint Horse |
| 57 | ERR1305963 | .  | .  | .  | .  | Modern | American Paint Horse |
| 58 | ERR2179544 | GG | .  | .  | .  | Modern | Arabian              |
| 59 | ERR2179551 | AG | .  | .  | .  | Modern | Arabian              |
| 60 | ERR1527951 | .  | .  | .  | .  | Modern | Arabian              |
| 61 | ERR1527971 | .  | .  | .  | GA | Modern | Franches-Montagnes   |
| 62 | ERR1527955 | .  | .  | .  | AA | Modern | Franches-Montagnes   |
| 63 | ERR979792  | .  | .  | .  | .  | Modern | Franches-Montagnes   |
| 64 | ERR979789  | AG | .  | .  | .  | Modern | Franches-Montagnes   |
| 65 | ERR1527962 | AG | .  | GA | .  | Modern | Franches-Montagnes   |
| 66 | ERR979787  | .  | .  | .  | GA | Modern | Franches-Montagnes   |
| 67 | ERR979791  | AC | .  | .  | .  | Modern | Franches-Montagnes   |
| 68 | ERR979786  | AG | GA | GA | GA | Modern | Franches-Montagnes   |
| 69 | ERR1527963 | AG | GA | GA | .  | Modern | Franches-Montagnes   |
| 70 | ERR1527956 | AG | .  | .  | .  | Modern | Franches-Montagnes   |
| 71 | ERR1527958 | AG | .  | .  | GA | Modern | Franches-Montagnes   |
| 72 | ERR2179545 | .  | .  | .  | .  | Modern | German Riding Pony   |
| 73 | ERR2179542 | .  | .  | .  | .  | Modern | German Riding Pony   |
| 74 | ERR1545183 | AG | .  | .  | .  | Modern | German Warmblood     |
| 75 | ERR1545178 | .  | .  | .  | GA | Modern | German Warmblood     |
| 76 | ERR1545189 | .  | .  | .  | .  | Modern | German Warmblood     |
| 77 | ERR1545190 | .  | .  | .  | .  | Modern | German Warmblood     |
| 78 | ERR1545186 | .  | .  | .  | .  | Modern | German Warmblood     |
| 79 | ERR1545181 | .  | .  | .  | .  | Modern | German Warmblood     |
| 80 | ERR1545188 | .  | .  | .  | .  | Modern | German Warmblood     |
| 81 | ERR2179553 | .  | .  | .  | .  | Modern | Haflinger            |
| 82 | ERR2179554 | .  | .  | .  | .  | Modern | Haflinger            |
| 83 | ERR2179555 | AG | .  | .  | .  | Modern | Haflinger            |
| 84 | ERR2179549 | AG | .  | .  | .  | Modern | Hannoveraner         |
| 85 | ERR2731057 | .  | .  | .  | .  | Modern | Icelandic Horse      |
| 86 | ERR982704  | AG | .  | .  | .  | Modern | Mongolian            |
| 87 | ERR2179546 | AG | .  | .  | AA | Modern | Morgan Horse         |
| 88 | ERR2179552 | .  | .  | .  | .  | Modern | Noriker              |
| 89 | ERR2179548 | .  | .  | .  | .  | Modern | Oldenburg Horse      |
| 90 | ERR982707  | AG | .  | .  | .  | Modern | Polish Warmblood     |
| 91 | ERR979799  | AG | .  | .  | .  | Modern | Quarter Horse        |
| 92 | ERR1527969 | .  | .  | .  | .  | Modern | Quarter Horse        |
| 93 | ERR1527970 | .  | .  | .  | .  | Modern | Quarter Horse        |
| 94 | ERR1527968 | .  | .  | .  | .  | Modern | Quarter Horse        |
| 95 | ERR868004  | .  | .  | .  | .  | Modern | Shetland Pony        |
| 96 | ERR868003  | .  | .  | .  | .  | Modern | Shetland Pony        |

|     | A          | B  | C  | D  | E  | F                               | G                                 |
|-----|------------|----|----|----|----|---------------------------------|-----------------------------------|
| 97  | ERR979803  | AG | .  | .  | .  | Modern                          | Standardbred                      |
| 98  | ERR1512897 | .  | .  | .  | GA | Modern                          | Standardbred                      |
| 99  | ERR2179556 | .  | .  | .  | .  | Modern                          | Swiss Warmblood                   |
| 100 | ERR1527972 | .  | .  | .  | .  | Modern                          | Swiss Warmblood                   |
| 101 | ERR2203766 | .  | GA | GA | GA | Modern                          | Trakehner                         |
| 102 | ERR1306526 | .  | GA | GA | .  | Modern                          | UK Warmblood (>50% Quarter Horse) |
| 103 | ERR1305961 | .  | AA | AA | GA | Modern                          | UK Warmblood (>50% Quarter Horse) |
| 104 | ERR2179543 | .  | .  | .  | AA | Modern                          | Welsh Pony                        |
| 105 | ERR2179550 | .  | .  | .  | .  | Modern                          | Welsh Pony                        |
| 106 | ERR1021822 | .  | .  | .  | .  | Modern                          | Yakutian Horse                    |
| 107 | ERR1021817 | .  | .  | .  | .  | Modern                          | Yakutian Horse                    |
| 108 | ERR1021821 | GG | .  | .  | .  | Modern                          | Yakutian Horse                    |
| 109 | ERR1021820 | .  | GA | GA | .  | Modern                          | Yakutian Horse                    |
| 110 | ERR3225567 | nc | .  | nc | nc | Modern                          | Thoroughbred                      |
| 111 | ERR3225630 | nc | GA | .  | nc | Modern                          | UK                                |
| 112 | ERR3225467 | .  | .  | .  | GA | Early Domestic (400-1500 years) | France                            |
| 113 | ERR3225602 | .  | nc | .  | .  | Early Domestic (400-1500 years) | Mongolia                          |
| 114 | ERR3225600 | .  | .  | .  | .  | Early Domestic (400-1500 years) | Mongolia                          |
| 115 | ERR3225559 | nc | .  | nc | nc | Early Domestic (400-1500 years) | Lithuania                         |
| 116 | ERR3225580 | AG | nc | nc | nc | Early Domestic (400-1500 years) | Estonia                           |
| 117 | ERR3225562 | nc | .  | nc | .  | Early Domestic (400-1500 years) | Lithuania                         |
| 118 | ERR3225639 | .  | .  | .  | .  | Early Domestic (400-1500 years) | Turkey                            |
| 119 | ERR3225570 | nc | .  | .  | .  | Early Domestic (400-1500 years) | Croatia                           |
| 120 | ERR3225558 | nc | .  | .  | nc | Early Domestic (400-1500 years) | Lithuania                         |
| 121 | ERR2112789 | .  | .  | nc | .  | Early Domestic (400-1500 years) | Kazakhstan                        |
| 122 | ERR3225483 | .  | nc | .  | nc | Early Domestic (400-1500 years) | Kyrgyzstan                        |
| 123 | ERR3225482 | .  | GA | GA | nc | Early Domestic (400-1500 years) | Kyrgyzstan                        |
| 124 | ERR3225635 | nc | .  | .  | nc | Early Domestic (400-1500 years) | Turkey                            |
| 125 | ERR3225544 | .  | .  | .  | .  | Early Domestic (400-1500 years) | Mongolia                          |
| 126 | ERR3225655 | .  | .  | .  | .  | Early Domestic (400-1500 years) | Turkey                            |
| 127 | ERR3225553 | nc | nc | .  | nc | Early Domestic (400-1500 years) | Germany                           |

|     | A          | B  | C  | D  | E  | F                                   | G       |
|-----|------------|----|----|----|----|-------------------------------------|---------|
| 128 | ERR3225637 | .  | .  | .  | .  | Early Domestic<br>(400-1500 years)  | Turkey  |
| 129 | ERR3225636 | .  | .  | nc | nc | Early Domestic<br>(400-1500 years)  | Turkey  |
| 130 | ERR3225643 | .  | nc | nc | nc | Early Domestic<br>(400-1500 years)  | Turkey  |
| 131 | ERR3225658 | nc | nc | nc | .  | Early Domestic<br>(400-1500 years)  | Turkey  |
| 132 | ERR3225646 | nc | nc | .  | nc | Early Domestic<br>(400-1500 years)  | Turkey  |
| 133 | ERR3225648 | nc | nc | nc | .  | Early Domestic<br>(400-1500 years)  | Turkey  |
| 134 | ERR3225654 | .  | .  | .  | .  | Early Domestic<br>(400-1500 years)  | Turkey  |
| 135 | ERR3225657 | AG | GA | AA | .  | Early Domestic<br>(400-1500 years)  | Turkey  |
| 136 | ERR3225593 | .  | .  | .  | .  | Early Domestic<br>(1501-2500 years) | Iran    |
| 137 | ERR3225647 | .  | GA | nc | .  | Early Domestic<br>(1501-2500 years) | Turkey  |
| 138 | ERR3225549 | AG | nc | nc | nc | Early Domestic<br>(1501-2500 years) | Iran    |
| 139 | ERR2112797 | .  | .  | nc | .  | Early Domestic<br>(1501-2500 years) | Turkey  |
| 140 | ERR3225481 | nc | nc | nc | .  | Early Domestic<br>(1501-2500 years) | France  |
| 141 | ERR3225640 | .  | GA | nc | nc | Early Domestic<br>(1501-2500 years) | Turkey  |
| 142 | ERR3225552 | nc | .  | nc | nc | Early Domestic<br>(1501-2500 years) | France  |
| 143 | ERR3225527 | .  | nc | nc | nc | Early Domestic<br>(1501-2500 years) | France  |
| 144 | ERR3225530 | nc | .  | nc | nc | Early Domestic<br>(1501-2500 years) | Germany |
| 145 | ERR3225515 | nc | nc | nc | .  | Early Domestic<br>(1501-2500 years) | France  |
| 146 | ERR3225504 | nc | nc | GA | .  | Early Domestic<br>(1501-2500 years) | France  |
| 147 | ERR3225499 | .  | .  | .  | .  | Early Domestic<br>(1501-2500 years) | France  |

|     | A          | B  | C  | D  | E  | F                                   | G        |
|-----|------------|----|----|----|----|-------------------------------------|----------|
| 148 | ERR2112790 | nc | .  | nc | nc | Early Domestic<br>(1501-2500 years) | Germany  |
| 149 | ERR2112788 | AG | .  | .  | nc | Early Domestic<br>(1501-2500 years) | Mongolia |
| 150 | ERR3225532 | nc | .  | .  | .  | Early Domestic<br>(1501-2500 years) | Mongolia |
| 151 | ERR3225534 | AG | .  | nc | .  | Early Domestic<br>(1501-2500 years) | Mongolia |
| 152 | ERR3225531 | .  | nc | .  | .  | Early Domestic<br>(1501-2500 years) | Mongolia |
| 153 | ERR3225533 | .  | nc | nc | nc | Early Domestic<br>(1501-2500 years) | Mongolia |
| 154 | ERR3225535 | nc | .  | .  | nc | Early Domestic<br>(1501-2500 years) | Mongolia |
| 155 | ERR3225586 | nc | .  | nc | nc | Early Domestic<br>(1501-2500 years) | France   |
| 156 | ERR3225453 | nc | nc | nc | .  | Early Domestic<br>(1501-2500 years) | France   |
| 157 | ERR3225451 | .  | nc | nc | nc | Early Domestic<br>(1501-2500 years) | France   |
| 158 | ERR2112715 | .  | .  | nc | nc | Early Domestic<br>(1501-2500 years) | France   |
| 159 | ERR3225459 | nc | .  | .  | nc | Early Domestic<br>(1501-2500 years) | Russia   |
| 160 | ERR3225523 | nc | nc | .  | nc | Early Domestic<br>(2501-3500 years) | Spain    |
| 161 | ERR3225579 | AG | GA | nc | .  | Early Domestic<br>(2501-3500 years) | Estonia  |
| 162 | ERR2112796 | .  | nc | .  | .  | Early Domestic<br>(2501-3500 years) | Mongolia |
| 163 | ERR3225621 | AG | .  | .  | .  | Early Domestic<br>(2501-3500 years) | Mongolia |
| 164 | ERR3225614 | nc | .  | nc | nc | Early Domestic<br>(2501-3500 years) | Mongolia |

|     | A          | B  | C  | D  | E  | F                                   | G          |
|-----|------------|----|----|----|----|-------------------------------------|------------|
| 165 | ERR3225617 | nc | .  | nc | nc | Early Domestic<br>(2501-3500 years) | Mongolia   |
| 166 | ERR3225622 | nc | nc | .  | nc | Early Domestic<br>(2501-3500 years) | Mongolia   |
| 167 | ERR3225620 | .  | nc | nc | .  | Early Domestic<br>(2501-3500 years) | Mongolia   |
| 168 | ERR3225615 | nc | .  | nc | .  | Early Domestic<br>(2501-3500 years) | Mongolia   |
| 169 | ERR3225623 | .  | .  | .  | .  | Early Domestic<br>(2501-3500 years) | Mongolia   |
| 170 | ERR3225619 | nc | .  | .  | .  | Early Domestic<br>(2501-3500 years) | Mongolia   |
| 171 | ERR2112795 | .  | .  | .  | .  | Early Domestic<br>(2501-3500 years) | Mongolia   |
| 172 | ERR3225618 | .  | .  | .  | .  | Early Domestic<br>(2501-3500 years) | Mongolia   |
| 173 | ERR2112763 | nc | nc | nc | .  | Early Domestic<br>(2501-3500 years) | Russia     |
| 174 | ERR3225465 | .  | nc | .  | nc | Early Domestic<br>(2501-3500 years) | Russia     |
| 175 | ERR3225541 | .  | nc | nc | nc | Early Domestic<br>(3501-5500 years) | Kazakhstan |
| 176 | ERR3225489 | .  | nc | nc | nc | Early Domestic<br>(3501-5500 years) | Spain      |
| 177 | ERR3225490 | .  | nc | nc | .  | Early Domestic<br>(3501-5500 years) | Spain      |
| 178 | ERR2112765 | AG | .  | .  | .  | Early Domestic<br>(3501-5500 years) | Kazakhstan |
| 179 | ERR2112768 | .  | nc | .  | nc | Early Domestic<br>(3501-5500 years) | Kazakhstan |
| 180 | ERR2112767 | AG | .  | .  | .  | Early Domestic<br>(3501-5500 years) | Kazakhstan |
| 181 | ERR2112766 | GG | nc | nc | .  | Early Domestic<br>(3501-5500 years) | Kazakhstan |

|     | A          | B  | C  | D  | E  | F                                   | G          |
|-----|------------|----|----|----|----|-------------------------------------|------------|
| 182 | ERR2112764 | nc | .  | .  | .  | Early Domestic<br>(3501-5500 years) | Kazakhstan |
| 183 | ERR3225666 | nc | nc | nc | .  | Early Domestic<br>(3501-5500 years) | Kazakhstan |
| 184 | ERR2112780 | .  | nc | nc | nc | Early Domestic<br>(3501-5500 years) | Kazakhstan |
| 185 | ERR2112716 | nc | nc | nc | .  | Early Domestic<br>(3501-5500 years) | Kazakhstan |
| 186 | ERR2112719 | AG | nc | nc | .  | Early Domestic<br>(3501-5500 years) | Kazakhstan |
| 187 | ERR3225669 | AG | nc | nc | .  | Early Domestic<br>(3501-5500 years) | Kazakhstan |
| 188 | ERR2112774 | .  | .  | .  | nc | Early Domestic<br>(3501-5500 years) | Kazakhstan |
| 189 | ERR2112772 | AG | .  | .  | .  | Early Domestic<br>(3501-5500 years) | Kazakhstan |
| 190 | ERR2112776 | .  | nc | nc | nc | Early Domestic<br>(3501-5500 years) | Kazakhstan |
| 191 | ERR2112778 | nc | GA | nc | nc | Early Domestic<br>(3501-5500 years) | Kazakhstan |
| 192 | ERR2112777 | .  | nc | nc | nc | Early Domestic<br>(3501-5500 years) | Kazakhstan |
| 193 | ERR2112771 | .  | nc | .  | nc | Early Domestic<br>(3501-5500 years) | Kazakhstan |
| 194 | ERR2112773 | AG | .  | .  | .  | Early Domestic<br>(3501-5500 years) | Kazakhstan |
| 195 | ERR2112769 | GG | .  | .  | .  | Early Domestic<br>(3501-5500 years) | Kazakhstan |
| 196 | ERR2112770 | GG | .  | .  | .  | Early Domestic<br>(3501-5500 years) | Kazakhstan |
| 197 | ERR3225563 | .  | .  | .  | .  | Ancient (~24000<br>years)           | Russia     |
| 198 | ERR982705  | .  | .  | nc | .  | Przewalski                          |            |
| 199 | ERR982714  | AG | .  | nc | .  | Przewalski                          |            |
| 200 | ERR982717  | AG | .  | .  | .  | Przewalski                          |            |
| 201 | ERR982706  | AG | .  | .  | .  | Przewalski                          |            |
| 202 | ERR982708  | GG | .  | .  | .  | Przewalski                          |            |
| 203 | ERR982716  | .  | .  | .  | .  | Przewalski                          |            |



|     | A         | B  | C  | D | E  | F                                         | G |
|-----|-----------|----|----|---|----|-------------------------------------------|---|
| 204 | ERR982718 | .  | .  | . | .  | Przewalski                                |   |
| 205 | ERR982709 | .  | .  | . | .  | Przewalski                                |   |
| 206 | ERR982712 | .  | .  | . | .  | Przewalski                                |   |
| 207 | ERR982715 | GG | .  | . | .  | Przewalski                                |   |
| 208 | ERR982721 | nc | nc | . | nc | Przewalski                                |   |
| 209 | ERR982713 | .  | .  | . | .  | Przewalski x<br>Domesticated F1<br>hybrid |   |
