# Supplementary material for: Commercial genetic testing for type 2 polysaccharide storage myopathy and myofibrillar myopathy does not correspond to a histopathological diagnosis
Source: PubMed Central journal article supplement — Equine Vet J. 2020 Oct 29;53(4):690–700. doi: 10.1111/evj.13345 (PMC7937766; doi:10.1111/evj.13345), 2020-10-29
Supplement: NIHMS1661435-supplement-Supp_Table_3.pdf [file NIHMS1661435-supplement-Supp_Table_3.pdf]

**Table S3:** The age, sex, glycogen synthase 1 (GYS1) mutation status, number of horses with PAS positive aggregates and number of horses with 4 or more fibres with desmin aggregates for control, type 2 polysaccharide storage myopathy (PSSM2) and myofibrillar myopathy (MFM) presented by breed (Warmblood (WB) and Arabian (AR)).

|                   | Warmblood        |                  |                        | Arabian    |             |               |
|-------------------|------------------|------------------|------------------------|------------|-------------|---------------|
|                   | Control          | PSSM2            | MFM                    | Control    | PSSM2       | MFM           |
| N                 | 54               | 55               | 37                     | 30         | 18          | 30            |
| Age (y)           | 8.6 ± 4.3        | 9.7 ± 4.7        | 10.1 ± 4.8             | 12.4 ± 5.9 | 13.2 ± 3.8  | 13.9 ± 5.7    |
| Sex               | 20 f, 33 mc, 1 s | 19 f, 34 mc, 2 s | 15 f, 19 mc, 2 s, 1 un | 22 f, 8 mc | 10 f, 8 mc  | 18 f, 12 mc   |
| GYS1 mutation     | neg              | neg              | neg                    | nd         | 9 neg, 9 nd | 13 neg, 17 nd |
| PAS aggregates    | 0                | 55               | 24                     | 0          | 18          | 18            |
| Desmin aggregates | 0                | 24               | 37                     | 0          | 18          | 30            |

f = female; mc = male castrate; s = stallion; un = unknown

neg = negative; nd = not done

GYS1 = glycogen synthase 1

PAS= periodic acid Schiff's

PSSM2 = Polysaccharide storage myopathy type 2

MFM = Myofibrillar Myopathy
